# Supplementary material for: Association Between Socioeconomic Status and In Utero Fetal Brain Development
Source: PubMed Central journal article supplement (PMC8008281; doi:10.1001/jamanetworkopen.2021.3526), 2021-03-29

## Supplemental Online Content

Lu YC, Kapse K, Andersen N, et al. Association between socioeconomic status and in utero fetal brain development. *JAMA Netw Open*. 2021;4(3):e213526.  
doi:10.1001/jamanetworkopen.2021.3526

**eTable 1.** Spearman Correlation Coefficients Among Socioeconomic Status Measures

**eTable 2.** Magnetic Resonance Imaging Scans Obtained for Each Gestational Age Range

**eTable 3.** Brain Growth Rate vs Gestational Age Between First and Second Scans

**eTable 4.** Distress Measures

**eTable 5.** Associations Between Maternal Distress Measures and Parental Socioeconomic Status Measures

**eTable 6.** Associations Between Fetal Brain Volume and Cortical Features and Parental Socioeconomic Status Measures

**eTable 7.**  $\beta$  Coefficients of Gestational Age for Associations Between Fetal Brain Volume and Parental Socioeconomic Status Measures

**eTable 8.**  $\beta$  Coefficients of Gestational Age for Associations Between Brain Lobe Volume and Cortical Features and Maternal Socioeconomic Measures

**eTable 9.**  $\beta$  Coefficients of Gestational Age for Associations Between Brain Lobe Volume and Cortical Features and Paternal Socioeconomic Measures

**eTable 10.**  $\beta$  Coefficients of Fetal Sex for Associations Between Fetal Brain Volume and Parental Socioeconomic Status Measures

**eTable 11.**  $\beta$  Coefficients of Fetal Sex for Associations Between Brain Lobe Volume and Cortical Features and Maternal Socioeconomic Status Measures

**eTable 12.**  $\beta$  Coefficients of Fetal Sex for Associations Between Brain Lobe Volume and Cortical Features and Paternal Socioeconomic Status Measures

**eTable 13.** Associations Between Fetal Brain Volumes and Parental Socioeconomic Status Measures

**eTable 14.** Associations Between Brain Lobe Volumes and Cortical Features and Maternal Socioeconomic Status Measures

**eTable 15.** Associations Between Brain Lobe Volume and Cortical Features and Paternal Socioeconomic Status Measures

**eFigure 1.** Fetal Brain Magnetic Resonance Axial Plane Images and Reconstructed White Matter Surface at Different Gestational Ages

**eFigure 2.** Brain Tissue Segmentation

**eFigure 3.** Brain Parcellation

**eFigure 4.** Cortical Folding

**eFigure 5.** Subject Recruitment Flowchart

**eFigure 6.** Brain Tissue Volume vs Socioeconomic Status Score

**eFigure 7.** Brain Tissue Volume vs Gestational Age

**eFigure 8.** Cerebral Cortical Features vs Socioeconomic Status Score

**eFigure 9.** Cerebral Cortical Features vs Gestational Age

This supplemental material has been provided by the authors to give readers additional information about their work.

**eTable 1.** Spearman Correlation Coefficients Among Socioeconomic Status Measures  
 All correlation coefficients were highly significant ( $p < 0.001$ ).

|                     | Maternal Education Level | Paternal Education Level | Maternal Occupation Level | Paternal Occupation Level | Maternal SES Score | Paternal SES Score |
|---------------------|--------------------------|--------------------------|---------------------------|---------------------------|--------------------|--------------------|
| Maternal Education  | 1.00                     | 0.71                     | 0.70                      | 0.74                      | 0.89               | 0.75               |
| Paternal Education  |                          | 1.00                     | 0.59                      | 0.79                      | 0.65               | 0.95               |
| Maternal Occupation |                          |                          | 1.00                      | 0.74                      | 0.91               | 0.65               |
| Paternal Occupation |                          |                          |                           | 1.00                      | 0.74               | 0.90               |
| Maternal SES        |                          |                          |                           |                           | 1.00               | 0.71               |
| Paternal SES        |                          |                          |                           |                           |                    | 1.00               |

**eTable 2.** Magnetic Resonance Imaging Scans obtained for Each Gestational Age Range Includes the median, interquartile range (IQR), minimum, and maximum GA in each GA range. GA: Gestational age.

| GA Range | N of Scans | Median GA | GA IQR | Minimum GA | Maximum GA |
|----------|------------|-----------|--------|------------|------------|
| 24-25    | 3          | 24.4      | 0.5    | 24.0       | 24.7       |
| 25-26    | 6          | 25.6      | 0.3    | 25.0       | 25.9       |
| 26-27    | 6          | 26.4      | 0.6    | 26.0       | 26.7       |
| 27-28    | 12         | 27.6      | 0.4    | 27.0       | 27.9       |
| 28-29    | 14         | 28.3      | 0.3    | 28.1       | 28.7       |
| 29-30    | 13         | 29.3      | 0.5    | 29.1       | 29.9       |
| 30-31    | 8          | 30.2      | 0.4    | 30.1       | 30.7       |
| 31-32    | 13         | 31.4      | 0.4    | 31.0       | 31.9       |
| 32-33    | 8          | 32.4      | 0.2    | 32.0       | 32.7       |
| 33-34    | 16         | 33.6      | 0.4    | 33.0       | 33.9       |
| 34-35    | 16         | 34.6      | 0.5    | 34.0       | 34.9       |
| 35-36    | 20         | 35.3      | 0.5    | 35.0       | 35.9       |
| 36-37    | 21         | 36.4      | 0.6    | 36.0       | 36.9       |
| 37-38    | 15         | 37.3      | 0.4    | 37.0       | 37.9       |
| 38-39    | 10         | 38.3      | 0.4    | 38.0       | 38.9       |
| 39-40    | 3          | 39.1      | 0.2    | 39.1       | 39.4       |

**eTable 3.** Brain Growth Rate vs Gestational Age Between First and Second Scans

The median and 25<sup>th</sup> and 75<sup>th</sup> percentiles (Q1 and Q3) of the slopes measuring the brain growth rate through the difference of brain volumes/cortical features vs. GA at MRI (weeks) between the first and second MRI scans for those (40 subjects) who underwent two MRIs.

| Brain Tissue Volume (cm <sup>3</sup> ) |         |               |          |               |               |
|----------------------------------------|---------|---------------|----------|---------------|---------------|
|                                        | Low SES |               | High SES |               |               |
|                                        | Median  | [Q1, Q3]      | Median   | [Q1, Q3]      | $p_{SES}$     |
| CGM                                    | 6.30    | [6.11-7.54]   | 5.51     | [5.13-6.08]   | <b>0.01*</b>  |
| WM                                     | 8.02    | [6.81-9.70]   | 9.59     | [8.64-11.38]  | <b>0.01*</b>  |
| Cerebellum                             | 1.18    | [1.12-1.38]   | 1.29     | [1.06-1.39]   | 0.67          |
| DGM                                    | 1.22    | [1.15-1.27]   | 1.27     | [1.20-1.41]   | 0.19          |
| Brainstem                              | 0.29    | [0.26-0.31]   | 0.31     | [0.28-0.32]   | 0.15          |
| Whole Brain                            | 18.29   | [16.34-19.07] | 18.73    | [16.72-20.45] | 0.18          |
| Lobe Volume (cm <sup>3</sup> )         |         |               |          |               |               |
|                                        | Low SES |               | High SES |               |               |
|                                        | Median  | [Q1, Q3]      | Median   | [Q1, Q3]      | $p_{SES}$     |
| Frontal                                | 3.18    | [2.84, 3.88]  | 4.06     | [3.28, 4.57]  | <b>0.02*</b>  |
| Parietal                               | 2.08    | [1.68, 2.54]  | 2.62     | [2.12, 3.01]  | <b>0.01*</b>  |
| Temporal                               | 1.69    | [1.62, 1.83]  | 1.90     | [1.71, 2.14]  | <b>0.04*</b>  |
| Occipital                              | 0.78    | [0.63, 0.99]  | 1.09     | [0.94, 1.23]  | <b>0.002*</b> |
| LGI ( $\times 10^{-3}$ )               |         |               |          |               |               |
|                                        | Low SES |               | High SES |               |               |
|                                        | Median  | [Q1, Q3]      | Median   | [Q1, Q3]      | $p_{SES}$     |
| Frontal                                | 41.3    | [27.7, 54.0]  | 26.7     | [22.3, 51.0]  | 0.15          |
| Parietal                               | 60.6    | [50.8, 97.5]  | 51.7     | [42.7, 65.1]  | 0.06          |
| Temporal                               | 50.5    | [35.5, 75.0]  | 41.8     | [38.0, 54.6]  | 0.49          |
| Occipital                              | 47.2    | [36.8, 60.7]  | 50.1     | [41.9, 58.3]  | 0.71          |
| SDepth ( $\times 10^{-3}$ mm)          |         |               |          |               |               |
|                                        | Low SES |               | High SES |               |               |
|                                        | Median  | [Q1, Q3]      | Median   | [Q1, Q3]      | $p_{SES}$     |
| Frontal                                | 135     | [66, 168]     | 97       | [47, 163]     | 0.45          |
| Parietal                               | 236     | [200, 275]    | 189      | [159, 250]    | 0.07          |
| Temporal                               | 149     | [104, 216]    | 124      | [89, 166]     | 0.26          |
| Occipital                              | 154     | [137, 179]    | 148      | [132, 187]    | 0.67          |

**eTable 4.** Distress Measures

The median and 25<sup>th</sup> and 75<sup>th</sup> percentiles (Q1 and Q3) of the distress measures. Chi-square test was used for comparing the number of scans. Linear mixed-effects models were used for assessing the associations between the maternal distress measures and parental SES (0: low SES; 1: high SES), adjusting for GA at MRI (weeks) and fetal sex (female: 0; male: 1). N: Number of scans. SSAI: Spielberger State Anxiety Inventory. STAI: Spielberger Trait Anxiety

|                   | Low SES |        |             | High SES |        |          | <i>p</i> <sub>SES</sub> |
|-------------------|---------|--------|-------------|----------|--------|----------|-------------------------|
|                   | N       | Median | [Q1, Q3]    | N        | Median | [Q1, Q3] |                         |
| Low/High Distress | 26/14   |        |             | 52/18    |        |          | 0.30                    |
| SSAI              | 43      | 27     | [23, 32.75] | 72       | 27     | [23, 33] | 0.54                    |
| STAI              | 42      | 28     | [24, 35]    | 72       | 27.5   | [24, 36] | 0.72                    |
| PSS               | 42      | 10     | [6, 15]     | 71       | 10     | [6, 14]  | 0.97                    |
| EPDS              | 41      | 4      | [1, 6]      | 72       | 3      | [1, 6]   | 0.54                    |

**eTable 5.** Associations Between Maternal Distress Measures and Parental Socioeconomic Status Measures

The results of the linear mixed-effects models (LMM) for the associations between maternal distress measures and parental education/occupation/SES score, adjusting for GA at MRI (weeks) and fetal sex (female: 0; male: 1). GA: Gestational age. SSAI: Spielberger State Anxiety Inventory. STAI: Spielberger Trait Anxiety Inventory. PSS: Perceived Stress Scale. EPDS: Edinburgh Postnatal Depression Scale. None of the *p-values* were significant (*ps*>0.05).

|        | Maternal          |               |               |                   |               |               |                  |               |              |
|--------|-------------------|---------------|---------------|-------------------|---------------|---------------|------------------|---------------|--------------|
|        | Education         |               |               | Occupation        |               |               | SES Score        |               |              |
|        | $\beta_{M\_Educ}$ | 95% CI        | $p_{M\_Educ}$ | $\beta_{M\_Occu}$ | 95% CI        | $p_{M\_Occu}$ | $\beta_{M\_SES}$ | 95% CI        | $p_{M\_SES}$ |
| SSAI   | 0.29              | [-1.72, 2.29] | 0.78          | -0.85             | [-2.41, 0.71] | 0.28          | -0.07            | [-0.24, 0.11] | 0.46         |
| STAI   | 0.85              | [-1.16, 2.86] | 0.40          | 0.02              | [-1.62, 1.65] | 0.98          | 0.03             | [-0.15, 0.21] | 0.75         |
| PSS    | 0.79              | [-0.54, 2.11] | 0.24          | 0.24              | [-0.78, 1.26] | 0.64          | 0.05             | [-0.07, 0.16] | 0.44         |
| EPDS   | 0.30              | [-0.53, 1.14] | 0.47          | 0.24              | [-0.43, 0.90] | 0.48          | 0.03             | [-0.04, 0.10] | 0.42         |
|        | Paternal          |               |               |                   |               |               |                  |               |              |
|        | Education         |               |               | Occupation        |               |               | SES Score        |               |              |
|        | $\beta_{P\_Educ}$ | 95% CI        | $p_{P\_Educ}$ | $\beta_{P\_Occu}$ | 95% CI        | $p_{P\_Occu}$ | $\beta_{P\_SES}$ | 95% CI        | $p_{P\_SES}$ |
| STAI_S | 0.11              | [-1.48, 1.71] | 0.89          | -1.35             | [-2.93, 0.23] | 0.09          | -0.08            | [-0.24, 0.07] | 0.28         |
| STAI_T | 0.60              | [-0.99, 2.19] | 0.46          | -0.45             | [-2.13, 1.22] | 0.59          | -0.005           | [-0.17, 0.16] | 0.95         |
| PSS    | 0.48              | [-0.57, 1.52] | 0.37          | -0.30             | [-1.38, 0.77] | 0.58          | -0.001           | [-0.11, 0.10] | 0.98         |
| EPDS   | 0.43              | [-0.23, 1.10] | 0.20          | -0.06             | [-0.75, 0.63] | 0.86          | 0.01             | [-0.05, 0.08] | 0.70         |

**eTable 6.** Associations Between Fetal Brain Volume and Cortical Features and Parental Socioeconomic Status Measures

The results of the linear mixed-effects models (LMM) for the associations between fetal brain volumes/cortical features and parental SES (0: low SES; 1: high SES), adjusting for GA at MRI (weeks) and fetal sex (female: 0; male: 1). LS Mean: Least squares mean. SE: Standard error. GA: Gestational age. CGM: Cortical gray matter. WM: White matter. DGM: Deep gray

| Brain Tissue Volume (cm <sup>3</sup> ) |                         |                          |                                       |                             |                   |
|----------------------------------------|-------------------------|--------------------------|---------------------------------------|-----------------------------|-------------------|
|                                        | Low SES<br>(LS Mean±SE) | High SES<br>(LS Mean±SE) | $\beta_{SES}$                         | 95% CI for $\beta_{SES}$    | $p_{SES}$         |
| CGM                                    | 70.8±5.0                | 68.1±5.1                 | -2.70                                 | [-5.03, -0.37]              | <b>0.02*</b>      |
| WM                                     | 107±8                   | 113±8                    | 5.87                                  | [2.15, 9.60]                | <b>0.002*</b>     |
| Cerebellum                             | 10.5±0.8                | 10.9±0.9                 | 0.41                                  | [0.02, 0.80]                | <b>0.04</b>       |
| DGM                                    | 16.6±0.8                | 16.9±0.8                 | 0.35                                  | [-0.02, 0.73]               | 0.06              |
| Brainstem                              | 4.53±0.21               | 4.65±0.22                | 0.12                                  | [0.02, 0.22]                | <b>0.02*</b>      |
| Whole Brain                            | 209±10                  | 213±11                   | 4.06                                  | [-0.84, 8.96]               | 0.10              |
| Lobe Volume (cm <sup>3</sup> )         |                         |                          |                                       |                             |                   |
|                                        | Low SES<br>(LS Mean±SE) | High SES<br>(LS Mean±SE) | $\beta_{SES}$                         | 95% CI                      | $p_{SES}$         |
| Frontal                                | 42.2±3.4                | 44.1±3.5                 | 1.93                                  | [0.35, 3.52]                | <b>0.02*</b>      |
| Parietal                               | 26.4±2.4                | 28.1±2.4                 | 1.70                                  | [0.59, 2.81]                | <b>0.003*</b>     |
| Temporal                               | 20.5±1.4                | 21.6±1.4                 | 1.07                                  | [0.42, 1.72]                | <b>0.001*</b>     |
| Occipital                              | 9.7±1.1                 | 10.2±1.1                 | 0.44                                  | [-0.06, 0.94]               | 0.09              |
| LGI                                    |                         |                          |                                       |                             |                   |
|                                        | Low SES<br>(LS Mean±SE) | High SES<br>(LS Mean±SE) | $\beta_{SES}$<br>(×10 <sup>-3</sup> ) | 95% CI (×10 <sup>-3</sup> ) | $p_{SES}$         |
| Frontal                                | 1.25±0.05               | 1.22±0.05                | -29.0                                 | [-51.7, -6.2]               | <b>0.01*</b>      |
| Parietal                               | 1.40±0.08               | 1.34±0.08                | -58.9                                 | [-94.6, -23.3]              | <b>0.001*</b>     |
| Temporal                               | 1.37±0.06               | 1.34±0.06                | -31.3                                 | [-59.7, -3.0]               | <b>0.03*</b>      |
| Occipital                              | 1.32±0.07               | 1.27±0.07                | -47.6                                 | [-79.6, -15.6]              | <b>0.004*</b>     |
| SDepth (mm)                            |                         |                          |                                       |                             |                   |
|                                        | Low SES<br>(LS Mean±SE) | High SES<br>(LS Mean±SE) | $\beta_{SES}$<br>(×10 <sup>-3</sup> ) | 95% CI (×10 <sup>-3</sup> ) | $p_{SES}$         |
| Frontal                                | 1.53±0.20               | 1.47±0.20                | -57.6                                 | [-149.3, 34.2]              | 0.22              |
| Parietal                               | 2.25±0.27               | 2.00±0.28                | -246.3                                | [-373.5, -119.1]            | <b>&lt;0.001*</b> |
| Temporal                               | 1.97±0.22               | 1.85±0.22                | -120.0                                | [-220.9, -19.2]             | <b>0.02*</b>      |
| Occipital                              | 1.32±0.21               | 1.17±0.22                | -157.2                                | [-255.8, -58.7]             | <b>0.002*</b>     |



**eTable 7.**  $\beta$  coefficients of Gestational Age at Magnetic Resonance Imaging

The  $\beta$  coefficients of GA at MRI of the linear mixed-effects models (LMM) for the associations between fetal brain volumes (cm<sup>3</sup>) and parental education/occupation/SES score, adjusting for GA at MRI (weeks) and fetal sex (female: 0; male: 1). GA: Gestational age. CGM: Cortical gray matter. WM: White matter. DGM: Deep gray matter. Bold:  $p < 0.05$ . \*:  $q < 0.05$ .

|             | Maternal     |                |                   |              |                |                   |              |                |                   |
|-------------|--------------|----------------|-------------------|--------------|----------------|-------------------|--------------|----------------|-------------------|
|             | Education    |                |                   | Occupation   |                |                   | SES Score    |                |                   |
|             | $\beta_{GA}$ | 95% CI         | $p_{GA}$          | $\beta_{GA}$ | 95% CI         | $p_{GA}$          | $\beta_{GA}$ | 95% CI         | $p_{GA}$          |
| CGM         | 5.90         | [5.60, 6.19]   | <b>&lt;0.001*</b> | 5.89         | [5.59, 6.19]   | <b>&lt;0.001*</b> | 5.89         | [5.59, 6.19]   | <b>&lt;0.001*</b> |
| WM          | 9.17         | [8.69, 9.64]   | <b>&lt;0.001*</b> | 9.19         | [8.72, 9.67]   | <b>&lt;0.001*</b> | 9.19         | [8.72, 9.66]   | <b>&lt;0.001*</b> |
| Cerebellum  | 1.21         | [1.16, 1.26]   | <b>&lt;0.001*</b> | 1.21         | [1.16, 1.26]   | <b>&lt;0.001*</b> | 1.21         | [1.16, 1.26]   | <b>&lt;0.001*</b> |
| DGM         | 1.23         | [1.18, 1.28]   | <b>&lt;0.001*</b> | 1.23         | [1.18, 1.28]   | <b>&lt;0.001*</b> | 1.23         | [1.18, 1.28]   | <b>&lt;0.001*</b> |
| Brainstem   | 0.29         | [0.28, 0.30]   | <b>&lt;0.001*</b> | 0.29         | [0.28, 0.30]   | <b>&lt;0.001*</b> | 0.29         | [0.28, 0.30]   | <b>&lt;0.001*</b> |
| Whole Brain | 17.79        | [17.17, 18.42] | <b>&lt;0.001*</b> | 17.81        | [17.19, 18.44] | <b>&lt;0.001*</b> | 17.81        | [17.18, 18.43] | <b>&lt;0.001*</b> |
|             | Paternal     |                |                   |              |                |                   |              |                |                   |
|             | Education    |                |                   | Occupation   |                |                   | SES Score    |                |                   |
|             | $\beta_{GA}$ | 95% CI         | $p_{GA}$          | $\beta_{GA}$ | 95% CI         | $p_{GA}$          | $\beta_{GA}$ | 95% CI         | $p_{GA}$          |
| CGM         | 5.90         | [5.60, 6.20]   | <b>&lt;0.001*</b> | 5.92         | [5.62, 6.21]   | <b>&lt;0.001*</b> | 5.91         | [5.61, 6.20]   | <b>&lt;0.001*</b> |
| WM          | 9.18         | [8.70, 9.65]   | <b>&lt;0.001*</b> | 9.13         | [8.66, 9.61]   | <b>&lt;0.001*</b> | 9.15         | [8.67, 9.62]   | <b>&lt;0.001*</b> |
| Cerebellum  | 1.21         | [1.16, 1.26]   | <b>&lt;0.001*</b> | 1.21         | [1.15, 1.26]   | <b>&lt;0.001*</b> | 1.21         | [1.16, 1.26]   | <b>&lt;0.001*</b> |
| DGM         | 1.23         | [1.18, 1.28]   | <b>&lt;0.001*</b> | 1.23         | [1.18, 1.27]   | <b>&lt;0.001*</b> | 1.23         | [1.18, 1.27]   | <b>&lt;0.001*</b> |
| Brainstem   | 0.29         | [0.28, 0.30]   | <b>&lt;0.001*</b> | 0.29         | [0.28, 0.30]   | <b>&lt;0.001*</b> | 0.29         | [0.28, 0.30]   | <b>&lt;0.001*</b> |
| Whole Brain | 17.80        | [17.18, 18.42] | <b>&lt;0.001*</b> | 17.77        | [17.14, 18.40] | <b>&lt;0.001*</b> | 17.78        | [17.15, 18.40] | <b>&lt;0.001*</b> |

**eTable 8.** Associations Between Brain Lobe Volumes and Cortical Features and Maternal Socioeconomic Measures

The  $\beta$  coefficients of GA at MRI of the linear mixed-effects models (LMM) for the associations between the brain lobe volumes/cortical features and maternal education/occupation/SES score, adjusting for GA at MRI (weeks) and fetal sex (female: 0; male: 1). GA: Gestational age. LGI: Local gyrification index. SDepth: Sulcal depth. Bold:

|           | Maternal Education             |              |                   |                          |          |                   |                               |            |                   |
|-----------|--------------------------------|--------------|-------------------|--------------------------|----------|-------------------|-------------------------------|------------|-------------------|
|           | Lobe Volume (cm <sup>3</sup> ) |              |                   | LGI ( $\times 10^{-3}$ ) |          |                   | SDepth ( $\times 10^{-3}$ mm) |            |                   |
|           | $\beta_{GA}$                   | 95% CI       | $p_{GA}$          | $\beta_{GA}$             | 95% CI   | $p_{GA}$          | $\beta_{GA}$                  | 95% CI     | $p_{GA}$          |
| Frontal   | 3.59                           | [3.38, 3.79] | <b>&lt;0.001*</b> | 35                       | [32, 38] | <b>&lt;0.001*</b> | 104                           | [92, 116]  | <b>&lt;0.001*</b> |
| Parietal  | 2.33                           | [2.19, 2.47] | <b>&lt;0.001*</b> | 59                       | [54, 63] | <b>&lt;0.001*</b> | 208                           | [192, 224] | <b>&lt;0.001*</b> |
| Temporal  | 1.80                           | [1.72, 1.88] | <b>&lt;0.001*</b> | 48                       | [45, 52] | <b>&lt;0.001*</b> | 132                           | [119, 144] | <b>&lt;0.001*</b> |
| Occipital | 0.92                           | [0.86, 0.98] | <b>&lt;0.001*</b> | 51                       | [47, 55] | <b>&lt;0.001*</b> | 166                           | [154, 179] | <b>&lt;0.001*</b> |
|           | Maternal Occupation            |              |                   |                          |          |                   |                               |            |                   |
|           | Lobe Volume (cm <sup>3</sup> ) |              |                   | LGI ( $\times 10^{-3}$ ) |          |                   | SDepth ( $\times 10^{-3}$ mm) |            |                   |
|           | $\beta_{GA}$                   | 95% CI       | $p_{GA}$          | $\beta_{GA}$             | 95% CI   | $p_{GA}$          | $\beta_{GA}$                  | 95% CI     | $p_{GA}$          |
| Frontal   | 3.60                           | [3.39, 3.80] | <b>&lt;0.001*</b> | 35                       | [32, 38] | <b>&lt;0.001*</b> | 104                           | [92, 115]  | <b>&lt;0.001*</b> |
| Parietal  | 2.33                           | [2.19, 2.48] | <b>&lt;0.001*</b> | 58                       | [54, 63] | <b>&lt;0.001*</b> | 207                           | [191, 223] | <b>&lt;0.001*</b> |
| Temporal  | 1.81                           | [1.72, 1.89] | <b>&lt;0.001*</b> | 48                       | [45, 52] | <b>&lt;0.001*</b> | 131                           | [118, 144] | <b>&lt;0.001*</b> |
| Occipital | 0.92                           | [0.86, 0.99] | <b>&lt;0.001*</b> | 50                       | [46, 54] | <b>&lt;0.001*</b> | 165                           | [153, 178] | <b>&lt;0.001*</b> |
|           | Maternal SES Score             |              |                   |                          |          |                   |                               |            |                   |
|           | Lobe Volume (cm <sup>3</sup> ) |              |                   | LGI ( $\times 10^{-3}$ ) |          |                   | SDepth ( $\times 10^{-3}$ mm) |            |                   |
|           | $\beta_{GA}$                   | 95% CI       | $p_{GA}$          | $\beta_{GA}$             | 95% CI   | $p_{GA}$          | $\beta_{GA}$                  | 95% CI     | $p_{GA}$          |
| Frontal   | 3.59                           | [3.39, 3.80] | <b>&lt;0.001*</b> | 35                       | [32, 38] | <b>&lt;0.001*</b> | 104                           | [92, 115]  | <b>&lt;0.001*</b> |
| Parietal  | 2.33                           | [2.19, 2.47] | <b>&lt;0.001*</b> | 59                       | [54, 63] | <b>&lt;0.001*</b> | 207                           | [191, 223] | <b>&lt;0.001*</b> |
| Temporal  | 1.81                           | [1.72, 1.89] | <b>&lt;0.001*</b> | 48                       | [45, 52] | <b>&lt;0.001*</b> | 131                           | [118, 144] | <b>&lt;0.001*</b> |
| Occipital | 0.92                           | [0.86, 0.98] | <b>&lt;0.001*</b> | 50                       | [46, 54] | <b>&lt;0.001*</b> | 165                           | [153, 178] | <b>&lt;0.001*</b> |

**eTable 9.**  $\beta$  Coefficients Associations Between Brain Lobe Volumes and Cortical Features and Paternal Socioeconomic Measures

The  $\beta$  coefficients of GA at MRI of the linear mixed-effects models (LMM) for the associations between the brain lobe volumes/cortical features and paternal education/occupation/SES score, adjusting for GA at MRI (weeks) and fetal sex (female: 0; male: 1). GA: Gestational age. LGI: Local gyrification index. SDepth: Sulcal depth. Bold:

|           | Paternal Education             |              |                   |                          |          |                   |                               |            |                   |
|-----------|--------------------------------|--------------|-------------------|--------------------------|----------|-------------------|-------------------------------|------------|-------------------|
|           | Lobe Volume (cm <sup>3</sup> ) |              |                   | LGI (×10 <sup>-3</sup> ) |          |                   | SDepth (×10 <sup>-3</sup> mm) |            |                   |
|           | $\beta_{GA}$                   | 95% CI       | $p_{GA}$          | $\beta_{GA}$             | 95% CI   | $p_{GA}$          | $\beta_{GA}$                  | 95% CI     | $p_{GA}$          |
| Frontal   | 3.59                           | [3.39, 3.79] | <b>&lt;0.001*</b> | 35                       | [32, 38] | <b>&lt;0.001*</b> | 104                           | [92, 116]  | <b>&lt;0.001*</b> |
| Parietal  | 2.33                           | [2.19, 2.47] | <b>&lt;0.001*</b> | 59                       | [54, 63] | <b>&lt;0.001*</b> | 207                           | [191, 224] | <b>&lt;0.001*</b> |
| Temporal  | 1.80                           | [1.72, 1.89] | <b>&lt;0.001*</b> | 48                       | [45, 52] | <b>&lt;0.001*</b> | 131                           | [118, 144] | <b>&lt;0.001*</b> |
| Occipital | 0.92                           | [0.86, 0.98] | <b>&lt;0.001*</b> | 50                       | [46, 54] | <b>&lt;0.001*</b> | 165                           | [154, 178] | <b>&lt;0.001*</b> |
|           | Paternal Occupation            |              |                   |                          |          |                   |                               |            |                   |
|           | Lobe Volume (cm <sup>3</sup> ) |              |                   | LGI (×10 <sup>-3</sup> ) |          |                   | SDepth (×10 <sup>-3</sup> mm) |            |                   |
|           | $\beta_{GA}$                   | 95% CI       | $p_{GA}$          | $\beta_{GA}$             | 95% CI   | $p_{GA}$          | $\beta_{GA}$                  | 95% CI     | $p_{GA}$          |
| Frontal   | 3.58                           | [3.37, 3.78] | <b>&lt;0.001*</b> | 35                       | [32, 38] | <b>&lt;0.001*</b> | 104                           | [93, 116]  | <b>&lt;0.001*</b> |
| Parietal  | 2.32                           | [2.18, 2.46] | <b>&lt;0.001*</b> | 59                       | [55, 64] | <b>&lt;0.001*</b> | 209                           | [193, 225] | <b>&lt;0.001*</b> |
| Temporal  | 1.79                           | [1.71, 1.88] | <b>&lt;0.001*</b> | 49                       | [45, 52] | <b>&lt;0.001*</b> | 132                           | [119, 145] | <b>&lt;0.001*</b> |
| Occipital | 0.92                           | [0.85, 0.98] | <b>&lt;0.001*</b> | 51                       | [47, 55] | <b>&lt;0.001*</b> | 167                           | [155, 180] | <b>&lt;0.001*</b> |
|           | Paternal SES Score             |              |                   |                          |          |                   |                               |            |                   |
|           | Lobe Volume (cm <sup>3</sup> ) |              |                   | LGI (×10 <sup>-3</sup> ) |          |                   | SDepth (×10 <sup>-3</sup> mm) |            |                   |
|           | $\beta_{GA}$                   | 95% CI       | $p_{GA}$          | $\beta_{GA}$             | 95% CI   | $p_{GA}$          | $\beta_{GA}$                  | 95% CI     | $p_{GA}$          |
| Frontal   | 3.58                           | [3.38, 3.78] | <b>&lt;0.001*</b> | 35                       | [32, 38] | <b>&lt;0.001*</b> | 104                           | [92, 116]  | <b>&lt;0.001*</b> |
| Parietal  | 2.32                           | [2.18, 2.46] | <b>&lt;0.001*</b> | 59                       | [54, 63] | <b>&lt;0.001*</b> | 209                           | [192, 225] | <b>&lt;0.001*</b> |
| Temporal  | 1.80                           | [1.72, 1.88] | <b>&lt;0.001*</b> | 48                       | [45, 52] | <b>&lt;0.001*</b> | 132                           | [119, 145] | <b>&lt;0.001*</b> |
| Occipital | 0.92                           | [0.85, 0.98] | <b>&lt;0.001*</b> | 51                       | [47, 55] | <b>&lt;0.001*</b> | 167                           | [154, 179] | <b>&lt;0.001*</b> |

**eTable 10.**  $\beta$  Coefficients of Fetal Sex for Associations Between Fetal Brain Volume and Parental Socioeconomic Status Measures

The  $\beta$  coefficients of fetal sex of the linear mixed-effects models (LMM) for the associations between fetal brain volumes (cm<sup>3</sup>) and parental education/occupation/SES score, adjusting for GA at MRI (weeks) and fetal sex (female: 0; male: 1). GA: Gestational age. CGM: Cortical gray matter. WM: White matter. DGM: Deep gray matter. Bold:  $p < 0.05$ . \*:  $\alpha < 0.05$ .

|             | Maternal         |               |               |                  |               |               |                  |               |               |
|-------------|------------------|---------------|---------------|------------------|---------------|---------------|------------------|---------------|---------------|
|             | Education        |               |               | Occupation       |               |               | SES Score        |               |               |
|             | $\beta_{Gender}$ | 95% CI        | $p_{Gender}$  | $\beta_{Gender}$ | 95% CI        | $p_{Gender}$  | $\beta_{Gender}$ | 95% CI        | $p_{Gender}$  |
| CGM         | 3.27             | [0.96, 5.59]  | <b>0.01*</b>  | 3.31             | [0.99, 5.64]  | <b>0.01*</b>  | 3.31             | [0.99, 5.63]  | <b>0.01*</b>  |
| WM          | 3.39             | [-0.31, 7.08] | 0.07          | 3.29             | [-0.42, 7.00] | 0.08          | 3.31             | [-0.38, 7.00] | 0.08          |
| Cerebellum  | 0.002            | [-0.39, 0.39] | 0.99          | -0.01            | [-0.40, 0.39] | 0.98          | -0.005           | [-0.39, 0.38] | 0.98          |
| DGM         | 0.35             | [-0.02, 0.73] | 0.06          | 0.35             | [-0.03, 0.72] | 0.07          | 0.35             | [-0.03, 0.72] | 0.07          |
| Brainstem   | 0.10             | [0.004, 0.20] | <b>0.04</b>   | 0.10             | [0.002, 0.20] | <b>0.046</b>  | 0.10             | [0.002, 0.20] | <b>0.04</b>   |
| Whole Brain | 7.12             | [2.22, 12.01] | <b>0.005*</b> | 7.05             | [2.15, 11.94] | <b>0.01*</b>  | 7.06             | [2.17, 11.95] | <b>0.005*</b> |
|             | Paternal         |               |               |                  |               |               |                  |               |               |
|             | Education        |               |               | Occupation       |               |               | SES Score        |               |               |
|             | $\beta_{Gender}$ | 95% CI        | $p_{Gender}$  | $\beta_{Gender}$ | 95% CI        | $p_{Gender}$  | $\beta_{Gender}$ | 95% CI        | $p_{Gender}$  |
| CGM         | 3.30             | [0.96, 5.64]  | <b>0.01*</b>  | 3.15             | [0.83, 5.47]  | <b>0.01*</b>  | 3.20             | [0.88, 5.52]  | <b>0.01*</b>  |
| WM          | 3.32             | [-0.40, 7.03] | 0.08          | 3.62             | [-0.11, 7.35] | 0.06          | 3.53             | [-0.18, 7.25] | 0.06          |
| Cerebellum  | -0.001           | [-0.40, 0.39] | 0.99          | 0.01             | [-0.38, 0.41] | 0.95          | 0.01             | [-0.39, 0.41] | 0.96          |
| DGM         | 0.35             | [-0.02, 0.72] | 0.07          | 0.37             | [-0.01, 0.74] | 0.06          | 0.36             | [-0.01, 0.74] | 0.06          |
| Brainstem   | 0.10             | [0.002, 0.20] | <b>0.04</b>   | 0.11             | [0.01, 0.21]  | <b>0.04</b>   | 0.11             | [0.01, 0.21]  | <b>0.04</b>   |
| Whole Brain | 7.06             | [2.17, 11.96] | <b>0.005*</b> | 7.25             | [2.33, 12.17] | <b>0.004*</b> | 7.21             | [2.30, 12.12] | <b>0.004*</b> |

**eTable 11.**  $\beta$  coefficients of fetal sex for Associations Between Brain Lobe Volume and Cortical Features and Maternal Socioeconomic Status Measures

The  $\beta$  coefficients of fetal sex of the linear mixed-effects models (LMM) for the associations between the brain lobe volumes/cortical features and maternal education/occupation/SES score, adjusting for GA at MRI (weeks) and fetal sex (female: 0; male: 1). GA: Gestational age. LGI: Local gyrification index. SDepth: Sulcal depth. Bold:  $p < 0.05$ . \*:  $q < 0.05$ .

|           | Maternal Education             |               |              |                          |           |              |                               |            |              |
|-----------|--------------------------------|---------------|--------------|--------------------------|-----------|--------------|-------------------------------|------------|--------------|
|           | Lobe Volume (cm <sup>3</sup> ) |               |              | LGI ( $\times 10^{-3}$ ) |           |              | SDepth ( $\times 10^{-3}$ mm) |            |              |
|           | $\beta_{Gender}$               | 95% CI        | $p_{Gender}$ | $\beta_{Gender}$         | 95% CI    | $p_{Gender}$ | $\beta_{Gender}$              | 95% CI     | $p_{Gender}$ |
| Frontal   | 1.09                           | [-0.49, 2.67] | 0.17         | 21                       | [-2, 43]  | 0.08         | 39                            | [-53, 131] | 0.41         |
| Parietal  | 0.96                           | [-0.13, 2.06] | 0.08         | 30                       | [-5, 65]  | 0.10         | 77                            | [-49, 204] | 0.23         |
| Temporal  | 0.80                           | [0.16, 1.44]  | <b>0.01</b>  | 10                       | [-18, 38] | 0.47         | 27                            | [-73, 127] | 0.60         |
| Occipital | 0.51                           | [0.01, 1.01]  | <b>0.04</b>  | 9                        | [-23, 40] | 0.58         | 11                            | [-85, 107] | 0.83         |
|           | Maternal Occupation            |               |              |                          |           |              |                               |            |              |
|           | Lobe Volume (cm <sup>3</sup> ) |               |              | LGI ( $\times 10^{-3}$ ) |           |              | SDepth ( $\times 10^{-3}$ mm) |            |              |
|           | $\beta_{Gender}$               | 95% CI        | $p_{Gender}$ | $\beta_{Gender}$         | 95% CI    | $p_{Gender}$ | $\beta_{Gender}$              | 95% CI     | $p_{Gender}$ |
| Frontal   | 1.06                           | [-0.52, 2.64] | 0.19         | 21                       | [-2, 44]  | 0.07         | 40                            | [-52, 131] | 0.39         |
| Parietal  | 0.93                           | [-0.17, 2.03] | 0.10         | 31                       | [-4, 66]  | 0.09         | 81                            | [-45, 208] | 0.21         |
| Temporal  | 0.78                           | [0.14, 1.43]  | <b>0.02</b>  | 11                       | [-17, 39] | 0.44         | 29                            | [-71, 129] | 0.57         |
| Occipital | 0.50                           | [0.01, 1.00]  | <b>0.048</b> | 10                       | [-22, 41] | 0.55         | 14                            | [-83, 111] | 0.78         |
|           | Maternal SES Score             |               |              |                          |           |              |                               |            |              |
|           | Lobe Volume (cm <sup>3</sup> ) |               |              | LGI ( $\times 10^{-3}$ ) |           |              | SDepth ( $\times 10^{-3}$ mm) |            |              |
|           | $\beta_{Gender}$               | 95% CI        | $p_{Gender}$ | $\beta_{Gender}$         | 95% CI    | $p_{Gender}$ | $\beta_{Gender}$              | 95% CI     | $p_{Gender}$ |
| Frontal   | 1.07                           | [-0.51, 2.65] | 0.18         | 21                       | [-2, 44]  | 0.07         | 39                            | [-52, 131] | 0.40         |
| Parietal  | 0.94                           | [-0.16, 2.03] | 0.09         | 31                       | [-4, 66]  | 0.09         | 81                            | [-45, 206] | 0.21         |
| Temporal  | 0.79                           | [0.14, 1.43]  | <b>0.02</b>  | 11                       | [-17, 39] | 0.45         | 29                            | [-71, 129] | 0.57         |
| Occipital | 0.51                           | [0.01, 1.00]  | <b>0.047</b> | 9                        | [-22, 41] | 0.56         | 13                            | [-83, 109] | 0.79         |

**eTable 12.**  $\beta$  Coefficients of Fetal Sex for Associations Between Brain Lobe Volume and Cortical Features and Paternal Socioeconomic Status Measures

The  $\beta$  coefficients of fetal sex of the linear mixed-effects models (LMM) for the associations between the brain lobe volumes/cortical features and paternal education/occupation/SES score, adjusting for GA at MRI (weeks) and fetal sex (female: 0; male: 1). GA: Gestational age. LGI: Local gyrification index. SDepth: Sulcal depth. Bold:  $p < 0.05$ . \*:  $q < 0.05$ .

|           | Paternal Education             |               |              |                          |           |              |                               |            |              |
|-----------|--------------------------------|---------------|--------------|--------------------------|-----------|--------------|-------------------------------|------------|--------------|
|           | Lobe Volume (cm <sup>3</sup> ) |               |              | LGI (×10 <sup>-3</sup> ) |           |              | SDepth (×10 <sup>-3</sup> mm) |            |              |
|           | $\beta_{Gender}$               | 95% CI        | $p_{Gender}$ | $\beta_{Gender}$         | 95% CI    | $p_{Gender}$ | $\beta_{Gender}$              | 95% CI     | $p_{Gender}$ |
| Frontal   | 1.07                           | [-0.51, 2.66] | 0.18         | 21                       | [-2, 44]  | 0.07         | 39                            | [-53, 131] | 0.40         |
| Parietal  | 0.94                           | [-0.16, 2.05] | 0.09         | 31                       | [-5, 66]  | 0.09         | 80                            | [-48, 208] | 0.22         |
| Temporal  | 0.79                           | [0.14, 1.43]  | <b>0.02</b>  | 11                       | [-18, 39] | 0.46         | 28                            | [-72, 129] | 0.58         |
| Occipital | 0.51                           | [0.01, 1.00]  | <b>0.047</b> | 9                        | [-22, 41] | 0.56         | 13                            | [-84, 110] | 0.79         |
|           | Paternal Occupation            |               |              |                          |           |              |                               |            |              |
|           | Lobe Volume (cm <sup>3</sup> ) |               |              | LGI (×10 <sup>-3</sup> ) |           |              | SDepth (×10 <sup>-3</sup> mm) |            |              |
|           | $\beta_{Gender}$               | 95% CI        | $p_{Gender}$ | $\beta_{Gender}$         | 95% CI    | $p_{Gender}$ | $\beta_{Gender}$              | 95% CI     | $p_{Gender}$ |
| Frontal   | 1.16                           | [-0.43, 2.75] | 0.15         | 20                       | [-3, 43]  | 0.09         | 37                            | [-55, 129] | 0.43         |
| Parietal  | 1.04                           | [-0.07, 2.14] | 0.07         | 27                       | [-8, 63]  | 0.13         | 67                            | [-60, 195] | 0.30         |
| Temporal  | 0.85                           | [0.21, 1.50]  | <b>0.01*</b> | 9                        | [-19, 37] | 0.54         | 21                            | [-79, 121] | 0.68         |
| Occipital | 0.53                           | [0.03, 1.03]  | <b>0.04</b>  | 7                        | [-25, 38] | 0.68         | 3                             | [-94, 101] | 0.95         |
|           | Paternal SES Score             |               |              |                          |           |              |                               |            |              |
|           | Lobe Volume (cm <sup>3</sup> ) |               |              | LGI (×10 <sup>-3</sup> ) |           |              | SDepth (×10 <sup>-3</sup> mm) |            |              |
|           | $\beta_{Gender}$               | 95% CI        | $p_{Gender}$ | $\beta_{Gender}$         | 95% CI    | $p_{Gender}$ | $\beta_{Gender}$              | 95% CI     | $p_{Gender}$ |
| Frontal   | 1.14                           | [-0.45, 2.73] | 0.16         | 20                       | [-3, 43]  | 0.09         | 38                            | [-54, 129] | 0.42         |
| Parietal  | 1.01                           | [-0.09, 2.11] | 0.07         | 28                       | [-7, 64]  | 0.12         | 71                            | [-56, 198] | 0.27         |
| Temporal  | 0.83                           | [0.19, 1.47]  | <b>0.01*</b> | 9                        | [-19, 38] | 0.51         | 23                            | [-77, 123] | 0.65         |
| Occipital | 0.52                           | [0.02, 1.02]  | <b>0.04</b>  | 7                        | [-24, 39] | 0.65         | 6                             | [-91, 103] | 0.91         |

**eTable 13.** Associations Between Fetal Brain Volumes and Parental Socioeconomic Status Measures

The results of the linear mixed-effects models (LMM) for the associations between fetal brain volumes (cm<sup>3</sup>) and parental education/occupation/SES score, adjusting for GA at MRI (weeks), fetal sex (female: 0; male: 1), and maternal distress (low: 0; high: 1). GA: Gestational age. CGM: Cortical gray matter. WM: White matter. DGM: Deep gray matter. Bold:  $p < 0.05$  \*  $p < 0.05$

|             | Maternal          |                |                  |                   |               |                  |                  |                 |                 |
|-------------|-------------------|----------------|------------------|-------------------|---------------|------------------|------------------|-----------------|-----------------|
|             | Education         |                |                  | Occupation        |               |                  | SES Score        |                 |                 |
|             | $\beta_{M\_Educ}$ | 95% CI         | $\rho_{M\_Educ}$ | $\beta_{M\_Occu}$ | 95% CI        | $\rho_{M\_Occu}$ | $\beta_{M\_SES}$ | 95% CI          | $\rho_{M\_SES}$ |
| CGM         | 0.03              | [-1.71, 1.76]  | 0.97             | 0.38              | [-1.05, 1.82] | 0.60             | 0.03             | [-0.13, 0.19]   | 0.67            |
| WM          | 5.04              | [2.08, 8.00]   | <b>0.001*</b>    | 2.72              | [0.20, 5.24]  | <b>0.03</b>      | 0.41             | [0.13, 0.69]    | <b>0.004*</b>   |
| Cerebellum  | 0.20              | [-0.09, 0.48]  | 0.17             | 0.05              | [-0.19, 0.29] | 0.69             | 0.01             | [-0.02, 0.04]   | 0.41            |
| DGM         | 0.38              | [0.10, 0.67]   | <b>0.01*</b>     | 0.22              | [-0.02, 0.46] | 0.07             | 0.03             | [0.01, 0.06]    | <b>0.02*</b>    |
| Brainstem   | 0.12              | [0.04, 0.20]   | <b>0.003*</b>    | 0.03              | [-0.03, 0.10] | 0.31             | 0.01             | [-0.0002, 0.01] | 0.06            |
| Whole Brain | 5.77              | [1.93, 9.60]   | <b>0.004*</b>    | 3.40              | [0.17, 6.64]  | <b>0.04</b>      | 0.50             | [0.14, 0.85]    | <b>0.01*</b>    |
|             | Paternal          |                |                  |                   |               |                  |                  |                 |                 |
|             | Education         |                |                  | Occupation        |               |                  | SES Score        |                 |                 |
|             | $\beta_{P\_Educ}$ | 95% CI         | $\rho_{P\_Educ}$ | $\beta_{P\_Occu}$ | 95% CI        | $\rho_{P\_Occu}$ | $\beta_{P\_SES}$ | 95% CI          | $\rho_{P\_SES}$ |
| CGM         | 0.13              | [-1.31, 1.56]  | 0.86             | 0.30              | [-1.21, 1.81] | 0.70             | 0.02             | [-0.12, 0.17]   | 0.74            |
| WM          | 3.25              | [0.76, 5.75]   | <b>0.01</b>      | 3.15              | [0.50, 5.79]  | <b>0.02</b>      | 0.34             | [0.08, 0.59]    | <b>0.01</b>     |
| Cerebellum  | 0.14              | [-0.09, 0.38]  | 0.23             | 0.02              | [-0.23, 0.27] | 0.85             | 0.01             | [-0.02, 0.03]   | 0.54            |
| DGM         | 0.19              | [-0.05, 0.43]  | 0.12             | 0.14              | [-0.11, 0.40] | 0.27             | 0.02             | [-0.01, 0.04]   | 0.17            |
| Brainstem   | 0.06              | [-0.003, 0.13] | 0.06             | 0.07              | [0.004, 0.14] | <b>0.04</b>      | 0.01             | [0.001, 0.01]   | <b>0.03</b>     |
| Whole Brain | 3.78              | [0.56, 7.00]   | <b>0.02</b>      | 3.68              | [0.28, 7.09]  | <b>0.03</b>      | 0.39             | [0.07, 0.72]    | <b>0.02</b>     |

**eTable 14.** Associations Between Brain Lobe Volumes and Cortical Features and Maternal Socioeconomic Status Measures

The results of the linear mixed-effects models (LMM) for the associations between the brain lobe volumes/cortical features and maternal education/occupation/SES score, adjusting for GA at MRI (weeks), fetal sex (female: 0; male: 1), and maternal distress (low: 0; high: 1). GA: Gestational age. LGI: Local gyrification index. SDepth: Sulcal depth. Bold:  $p < 0.05$ . \*:  $q < 0.05$ .

|           | Maternal Education             |               |                |                          |              |              |                               |              |                 |
|-----------|--------------------------------|---------------|----------------|--------------------------|--------------|--------------|-------------------------------|--------------|-----------------|
|           | Lobe Volume (cm <sup>3</sup> ) |               |                | LGI (×10 <sup>-3</sup> ) |              |              | SDepth (×10 <sup>-3</sup> mm) |              |                 |
|           | $\beta_{M\_LobeV}$             | 95% CI        | $p_{M\_LobeV}$ | $\beta_{M\_LGI}$         | 95% CI       | $p_{M\_LGI}$ | $\beta_{M\_SDepth}$           | 95% CI       | $p_{M\_SDepth}$ |
| Frontal   | 1.89                           | [0.56, 3.22]  | <b>0.01*</b>   | -16                      | [-32, 1]     | 0.07         | -43                           | [-113, 28]   | 0.23            |
| Parietal  | 1.27                           | [0.42, 2.13]  | <b>0.004*</b>  | -27                      | [-52, -3]    | <b>0.03</b>  | -105                          | [-196, -13]  | <b>0.03</b>     |
| Temporal  | 0.84                           | [0.33, 1.35]  | <b>0.002*</b>  | -5                       | [-26, 16]    | 0.64         | -28                           | [-103, 47]   | 0.46            |
| Occipital | 0.50                           | [0.14, 0.87]  | <b>0.01*</b>   | -19                      | [-41, 3]     | 0.09         | -40                           | [-108, 28]   | 0.25            |
|           | Maternal Occupation            |               |                |                          |              |              |                               |              |                 |
|           | Lobe Volume (cm <sup>3</sup> ) |               |                | LGI (×10 <sup>-3</sup> ) |              |              | SDepth (×10 <sup>-3</sup> mm) |              |                 |
|           | $\beta_{M\_LobeV}$             | 95% CI        | $p_{M\_LobeV}$ | $\beta_{M\_LGI}$         | 95% CI       | $p_{M\_LGI}$ | $\beta_{M\_SDepth}$           | 95% CI       | $p_{M\_SDepth}$ |
| Frontal   | 0.92                           | [-0.21, 2.04] | 0.11           | -7                       | [-21, 7]     | 0.32         | 3                             | [-55, 62]    | 0.91            |
| Parietal  | 0.63                           | [-0.09, 1.36] | 0.09           | -19                      | [-39, 2]     | 0.07         | -50                           | [-126, 27]   | 0.20            |
| Temporal  | 0.43                           | [-0.01, 0.86] | 0.06           | -6                       | [-24, 11]    | 0.48         | -29                           | [-91, 34]    | 0.36            |
| Occipital | 0.28                           | [-0.03, 0.59] | 0.08           | -13                      | [-32, 5]     | 0.16         | -22                           | [-78, 34]    | 0.44            |
|           | Maternal SES Score             |               |                |                          |              |              |                               |              |                 |
|           | Lobe Volume (cm <sup>3</sup> ) |               |                | LGI (×10 <sup>-3</sup> ) |              |              | SDepth (×10 <sup>-3</sup> mm) |              |                 |
|           | $\beta_{M\_LobeV}$             | 95% CI        | $p_{M\_LobeV}$ | $\beta_{M\_LGI}$         | 95% CI       | $p_{M\_LGI}$ | $\beta_{M\_SDepth}$           | 95% CI       | $p_{M\_SDepth}$ |
| Frontal   | 0.14                           | [0.02, 0.27]  | <b>0.02*</b>   | -1.2                     | [-2.7, 0.4]  | 0.15         | -1.2                          | [-7.7, 5.4]  | 0.72            |
| Parietal  | 0.10                           | [0.02, 0.18]  | <b>0.02*</b>   | -2.6                     | [-4.8, -0.3] | <b>0.03</b>  | -7.9                          | [-16.5, 0.6] | 0.07            |
| Temporal  | 0.07                           | [0.02, 0.11]  | <b>0.01*</b>   | -0.7                     | [-2.7, 1.2]  | 0.47         | -3.5                          | [-10.4, 3.5] | 0.32            |
| Occipital | 0.04                           | [0.01, 0.08]  | <b>0.02*</b>   | -1.8                     | [-3.9, 0.3]  | 0.08         | -3.3                          | [-9.6, 3.0]  | 0.30            |



**eTable 15.** Associations Between Brain lobe Volumes and Cortical Features and Paternal Socioeconomic Status Measures

The results of the linear mixed-effects models (LMM) for the associations between the brain lobe volumes/cortical features and paternal education/occupation/SES score, adjusting for GA at MRI (weeks), fetal sex (female: 0; male: 1), and maternal distress (low: 0; high: 1). GA: Gestational age. LGI: Local gyrification index. SDepth: Sulcal depth. Bold:  $p < 0.05$ . \*:  $q < 0.05$ .

|           | Paternal Education             |                 |                |                          |             |              |                               |              |                 |
|-----------|--------------------------------|-----------------|----------------|--------------------------|-------------|--------------|-------------------------------|--------------|-----------------|
|           | Lobe Volume (cm <sup>3</sup> ) |                 |                | LGI (×10 <sup>-3</sup> ) |             |              | SDepth (×10 <sup>-3</sup> mm) |              |                 |
|           | $\beta_{P\_LobeV}$             | 95% CI          | $p_{P\_LobeV}$ | $\beta_{P\_LGI}$         | 95% CI      | $p_{P\_LGI}$ | $\beta_{P\_SDepth}$           | 95% CI       | $p_{P\_SDepth}$ |
| Frontal   | 1.29                           | [0.18, 2.40]    | <b>0.02*</b>   | -9                       | [-23, 5]    | 0.19         | -15                           | [-73, 44]    | 0.62            |
| Parietal  | 0.60                           | [-0.13, 1.33]   | 0.11           | -17                      | [-37, 4]    | 0.11         | -48                           | [-125, 29]   | 0.22            |
| Temporal  | 0.53                           | [0.09, 0.96]    | <b>0.02*</b>   | -2                       | [-20, 16]   | 0.81         | -20                           | [-82, 43]    | 0.53            |
| Occipital | 0.33                           | [0.02, 0.63]    | <b>0.04</b>    | -11                      | [-29, 8]    | 0.25         | -37                           | [-93, 19]    | 0.20            |
|           | Paternal Occupation            |                 |                |                          |             |              |                               |              |                 |
|           | Lobe Volume (cm <sup>3</sup> ) |                 |                | LGI (×10 <sup>-3</sup> ) |             |              | SDepth (×10 <sup>-3</sup> mm) |              |                 |
|           | $\beta_{P\_LobeV}$             | 95% CI          | $p_{P\_LobeV}$ | $\beta_{P\_LGI}$         | 95% CI      | $p_{P\_LGI}$ | $\beta_{P\_SDepth}$           | 95% CI       | $p_{P\_SDepth}$ |
| Frontal   | 1.11                           | [-0.07, 2.28]   | 0.07           | -14                      | [-29, 1]    | 0.06         | -48                           | [-109, 13]   | 0.12            |
| Parietal  | 0.75                           | [-0.02, 1.51]   | 0.055          | -21                      | [-42, 0]    | 0.06         | -59                           | [-139, 22]   | 0.15            |
| Temporal  | 0.60                           | [0.15, 1.06]    | <b>0.01*</b>   | -9                       | [-28, 9]    | 0.33         | -31                           | [-97, 34]    | 0.35            |
| Occipital | 0.32                           | [-0.01, 0.64]   | 0.055          | -17                      | [-37, 2]    | 0.08         | -41                           | [-100, 18]   | 0.17            |
|           | Paternal SES Score             |                 |                |                          |             |              |                               |              |                 |
|           | Lobe Volume (cm <sup>3</sup> ) |                 |                | LGI (×10 <sup>-3</sup> ) |             |              | SDepth (×10 <sup>-3</sup> mm) |              |                 |
|           | $\beta_{P\_LobeV}$             | 95% CI          | $p_{P\_LobeV}$ | $\beta_{P\_LGI}$         | 95% CI      | $p_{P\_LGI}$ | $\beta_{P\_SDepth}$           | 95% CI       | $p_{P\_SDepth}$ |
| Frontal   | 0.12                           | [0.01, 0.24]    | <b>0.03*</b>   | -1.3                     | [-2.7, 0.1] | 0.07         | -3.7                          | [-9.6, 2.2]  | 0.21            |
| Parietal  | 0.07                           | [-0.0003, 0.15] | 0.051          | -2.0                     | [-4.1, 0.0] | 0.053        | -5.8                          | [-13.5, 2.0] | 0.15            |
| Temporal  | 0.06                           | [0.02, 0.10]    | <b>0.01*</b>   | -0.7                     | [-2.5, 1.1] | 0.45         | -2.8                          | [-9.1, 3.5]  | 0.38            |
| Occipital | 0.03                           | [0.003, 0.07]   | <b>0.03*</b>   | -1.6                     | [-3.4, 0.3] | 0.10         | -4.2                          | [-9.8, 1.5]  | 0.15            |

**eFigure 1.** Fetal Brain Magnetic Resonance Axial Plane Images and Reconstructed White Matter Surface at Different Gestational Ages

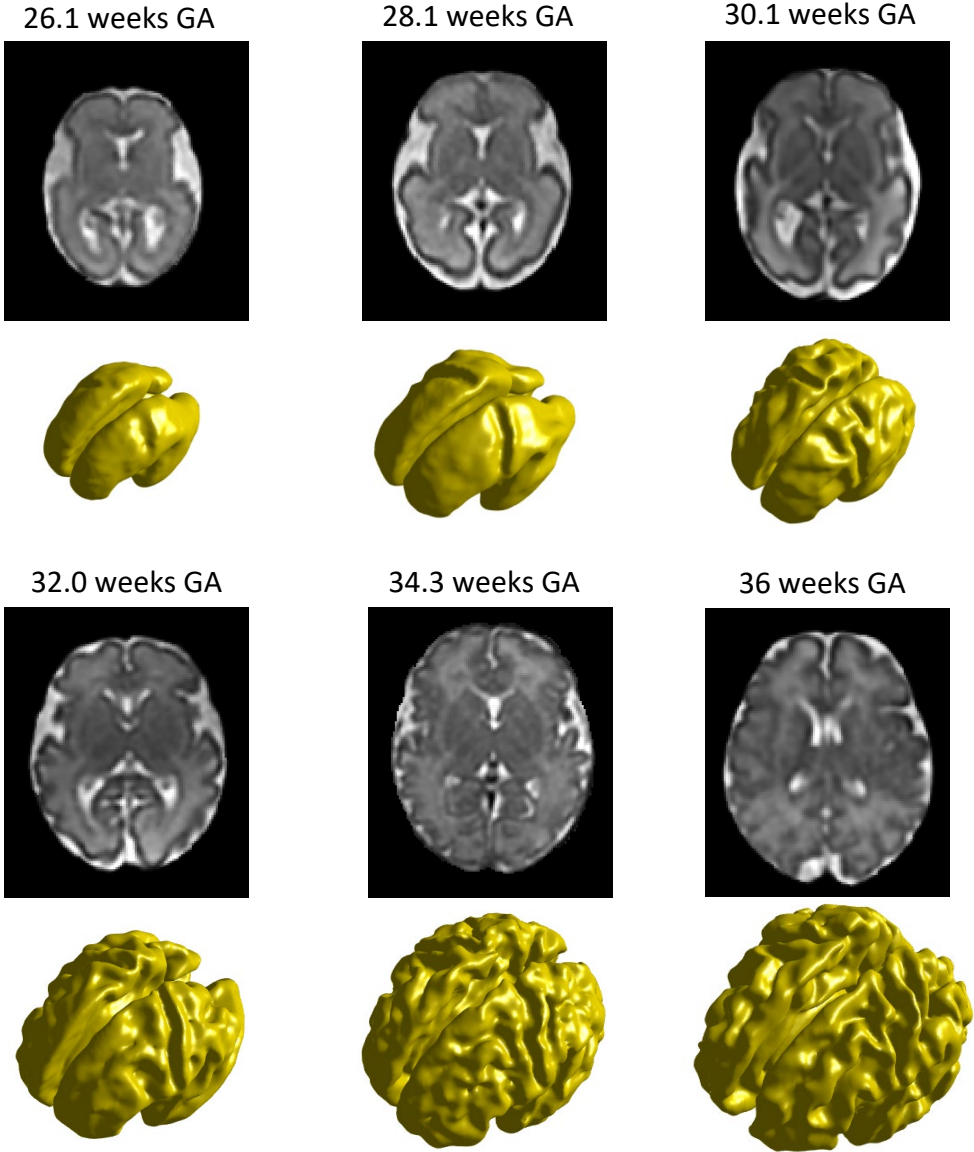

**eFigure 2.** Brain Tissue Segmentation

Illustration of Brain Tissue Segmentation by Draw-EM Algorithm and Manual Correction

(a) Axial plane; (b) Coronal plane; (c) Sagittal plane.

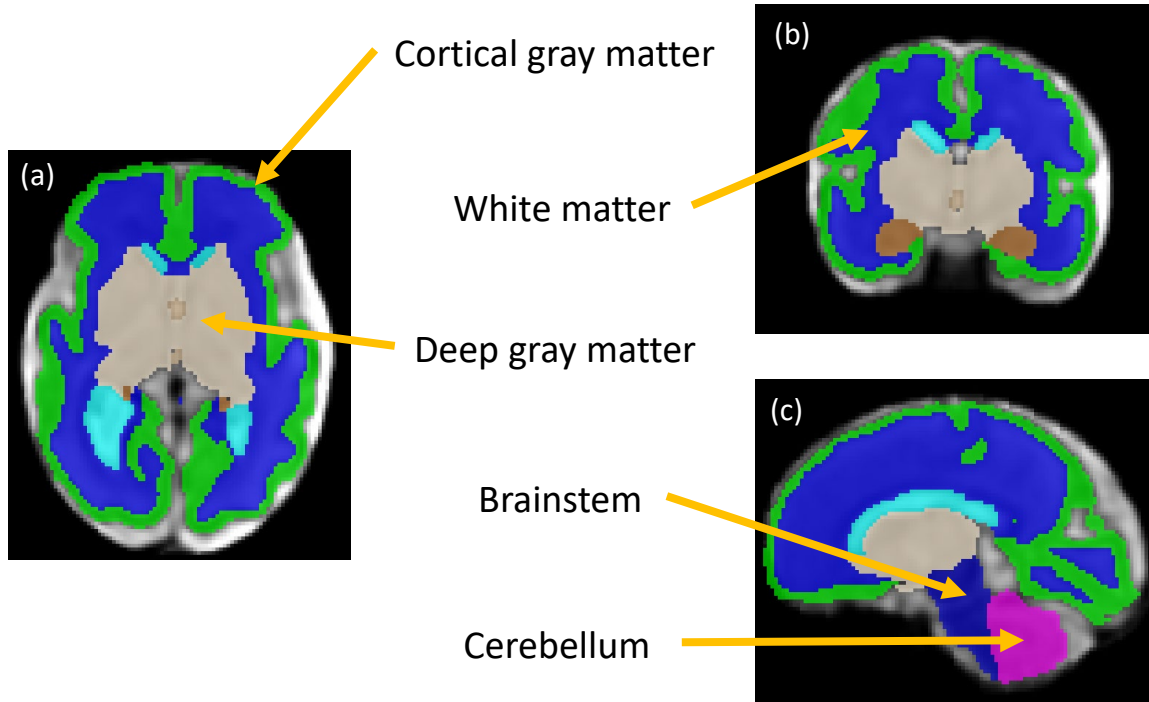

**eFigure 3. Brain Parcellation**

Illustration of brain parcellation by Draw-EM algorithm and manual correction. (a) Lateral view; (b) Medial view.

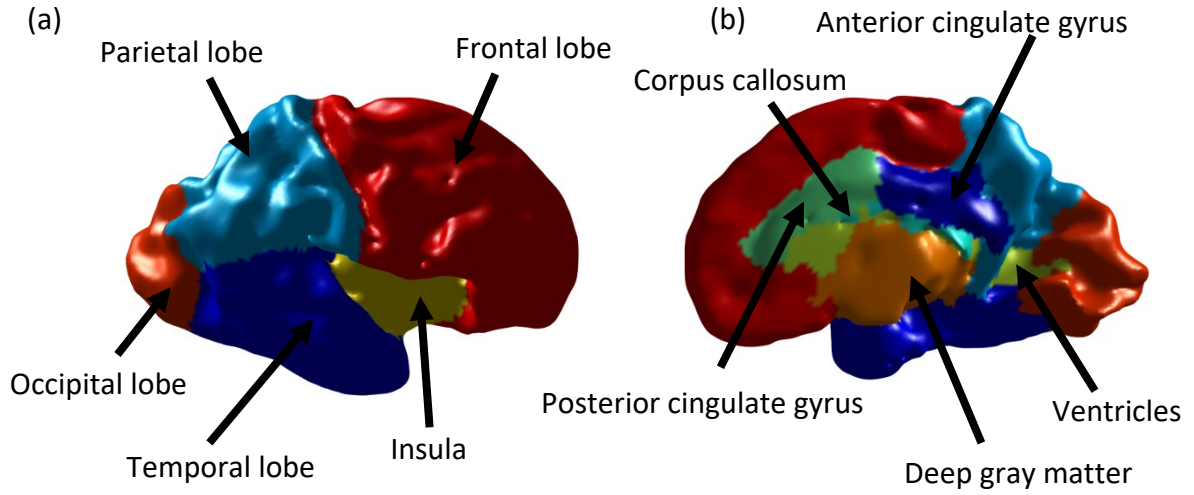

**eFigure 4. Cortical Folding**

Illustration of cortical folding features on white matter surfaces. (a) Local gyrification index; (b) Sulcal depth.

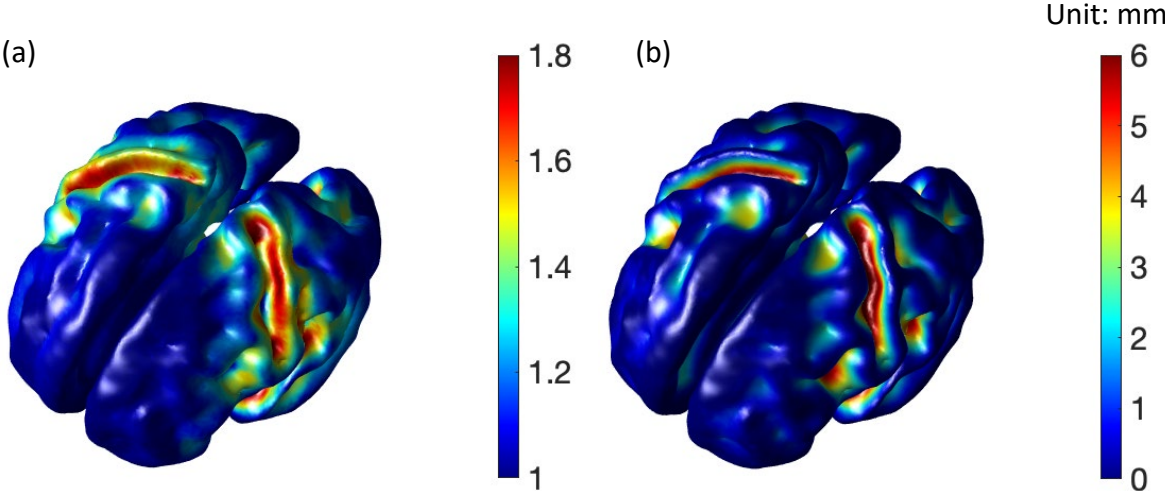

**eFigure 5. Subject Recruitment Flowchart**

Flow diagram summarizing our subject recruitment in this study. Eligible women were recruited from community maternal fetal medicine offices and referred by their obstetrics providers. Once screened for eligibility, mothers were invited to join the study by a fetal cardiologist. The study team spoke to potential participants alongside the fetal cardiologists and would follow up with those interested in participation. Written informed consent was obtained from all participants before completing study procedures.

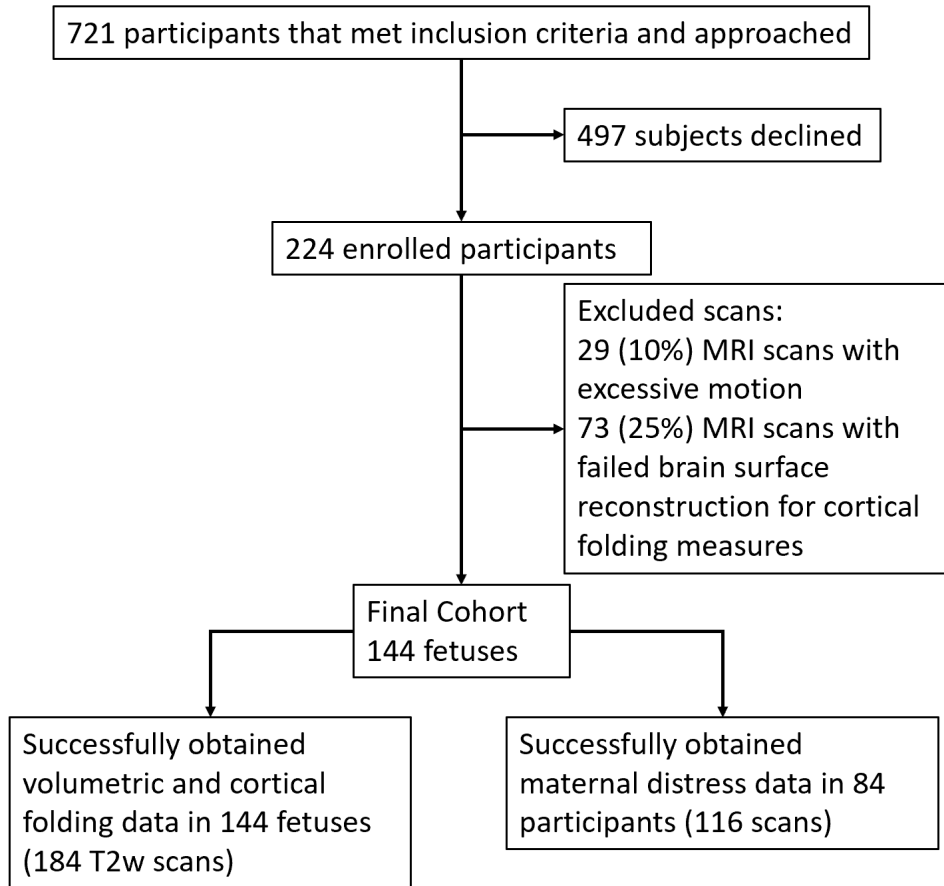

**eFigure 6.** Brain Tissue Volume vs Socioeconomic Status Score

Scatter plots of brain tissue volumes vs. SES scores. (a) Cortical gray matter (CGM); (b) White matter (WM); (c) Cerebellum; (d) Deep gray matter (DGM); (e) Brainstem; (f) Whole brain.

The straight lines are the linear fit of the data by parental sex. The *p*-values are corresponding to the  $p_{M\_SES}$  and  $p_{P\_SES}$  shown in Table 3. Bold *p*:  $p < 0.05$ .

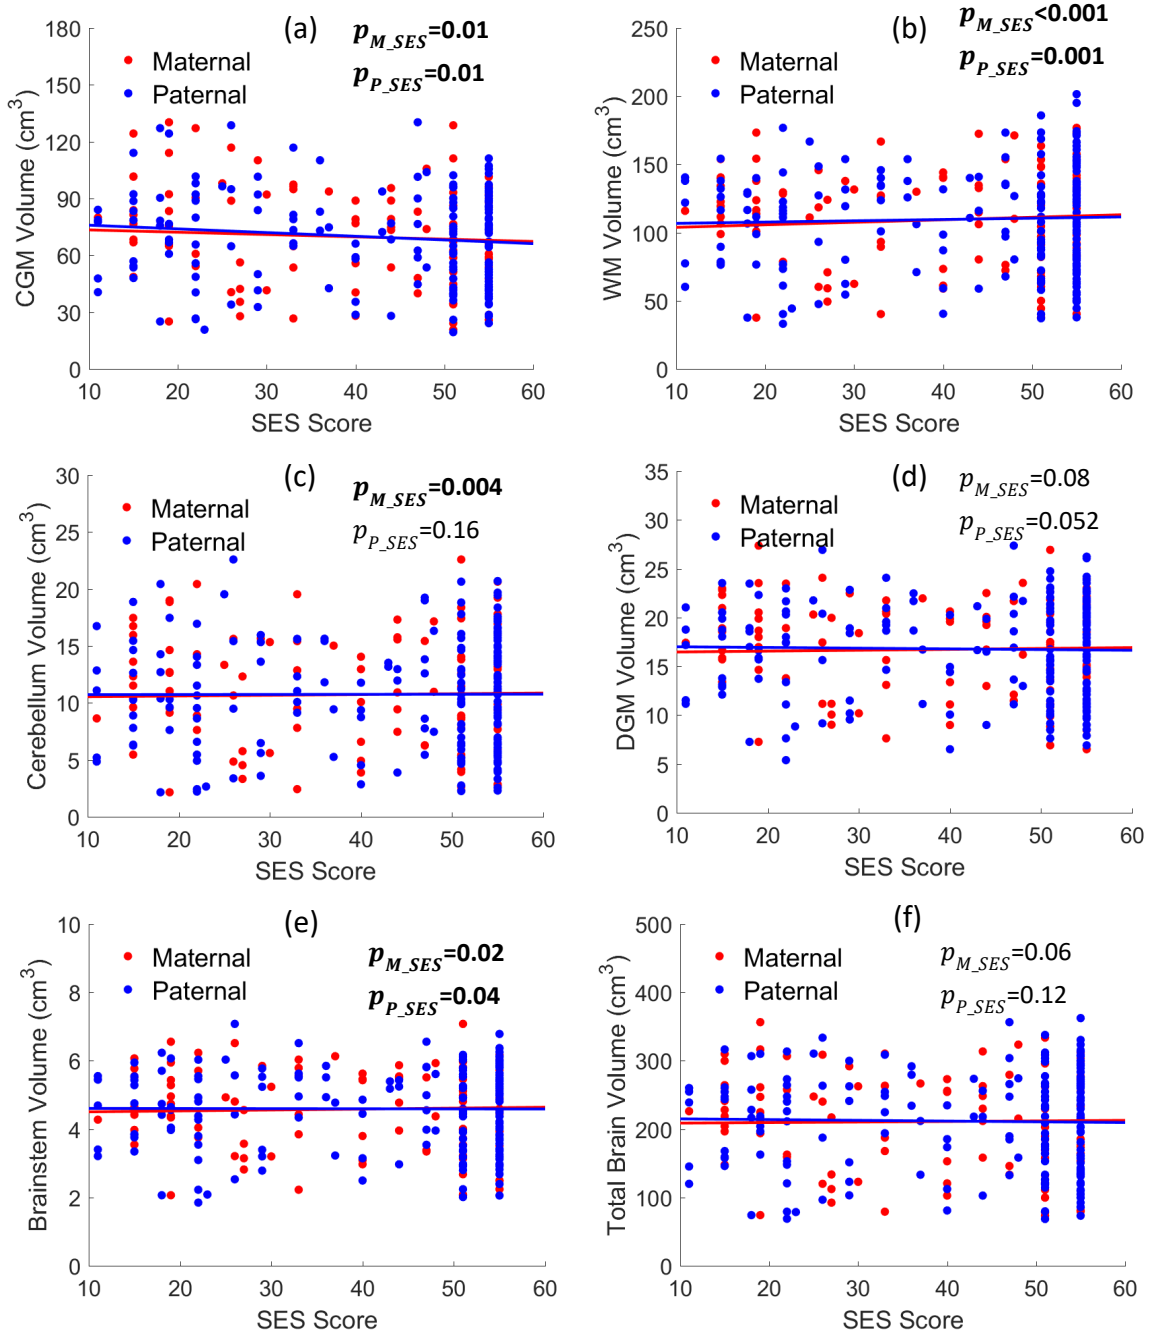

**eFigure 7. Brain Tissue Volume vs Gestational Age**

Scatter plots of brain tissue volumes vs. gestational age. (a) Cortical gray matter (CGM); (b) White matter (WM); (c) Cerebellum; (d) Deep gray matter (DGM); (e) Brainstem; (f) Whole brain. The straight lines are the linear fit of the data by parental SES. The  $p$ -values are corresponding to  $p_{SES}$  shown in eTable 6. Bold  $p$ :  $p < 0.05$ .

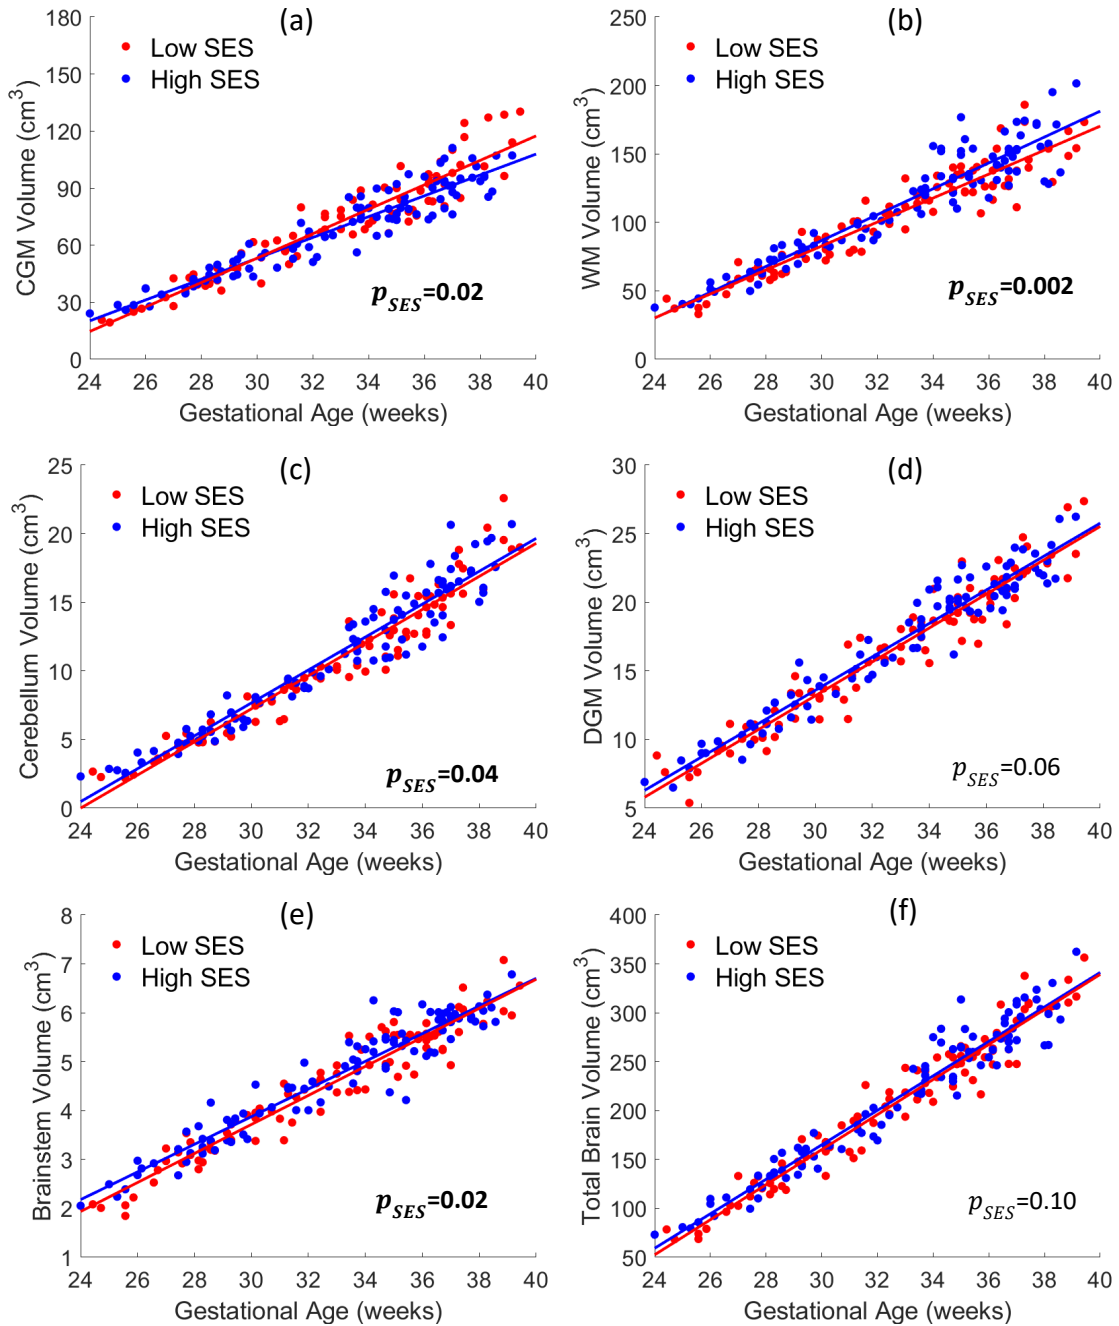



**Figure 8.** Cerebral Cortical Features vs Socioeconomic Status Score

Scatter plots of brain lobe volume/LGI/SDepth vs. SES scores. (a)-(c): Frontal lobe; (d)-(f) Parietal lobe; (g)-(i): Temporal lobe; (j)-(l): Occipital lobe. The straight lines are the linear fit of the data by parental sex. The *p*-values are corresponding to the maternal  $p_{M\_LobeV}$ ,  $p_{M\_LGI}$ , and  $p_{M\_SDepth}$  and paternal  $p_{P\_LobeV}$ ,  $p_{P\_LGI}$ , and  $p_{P\_SDepth}$  shown in Table 4 and 5. LGI: Local gyrification index. SDepth: Sulcal depth. Bold *p*:  $p < 0.05$ .

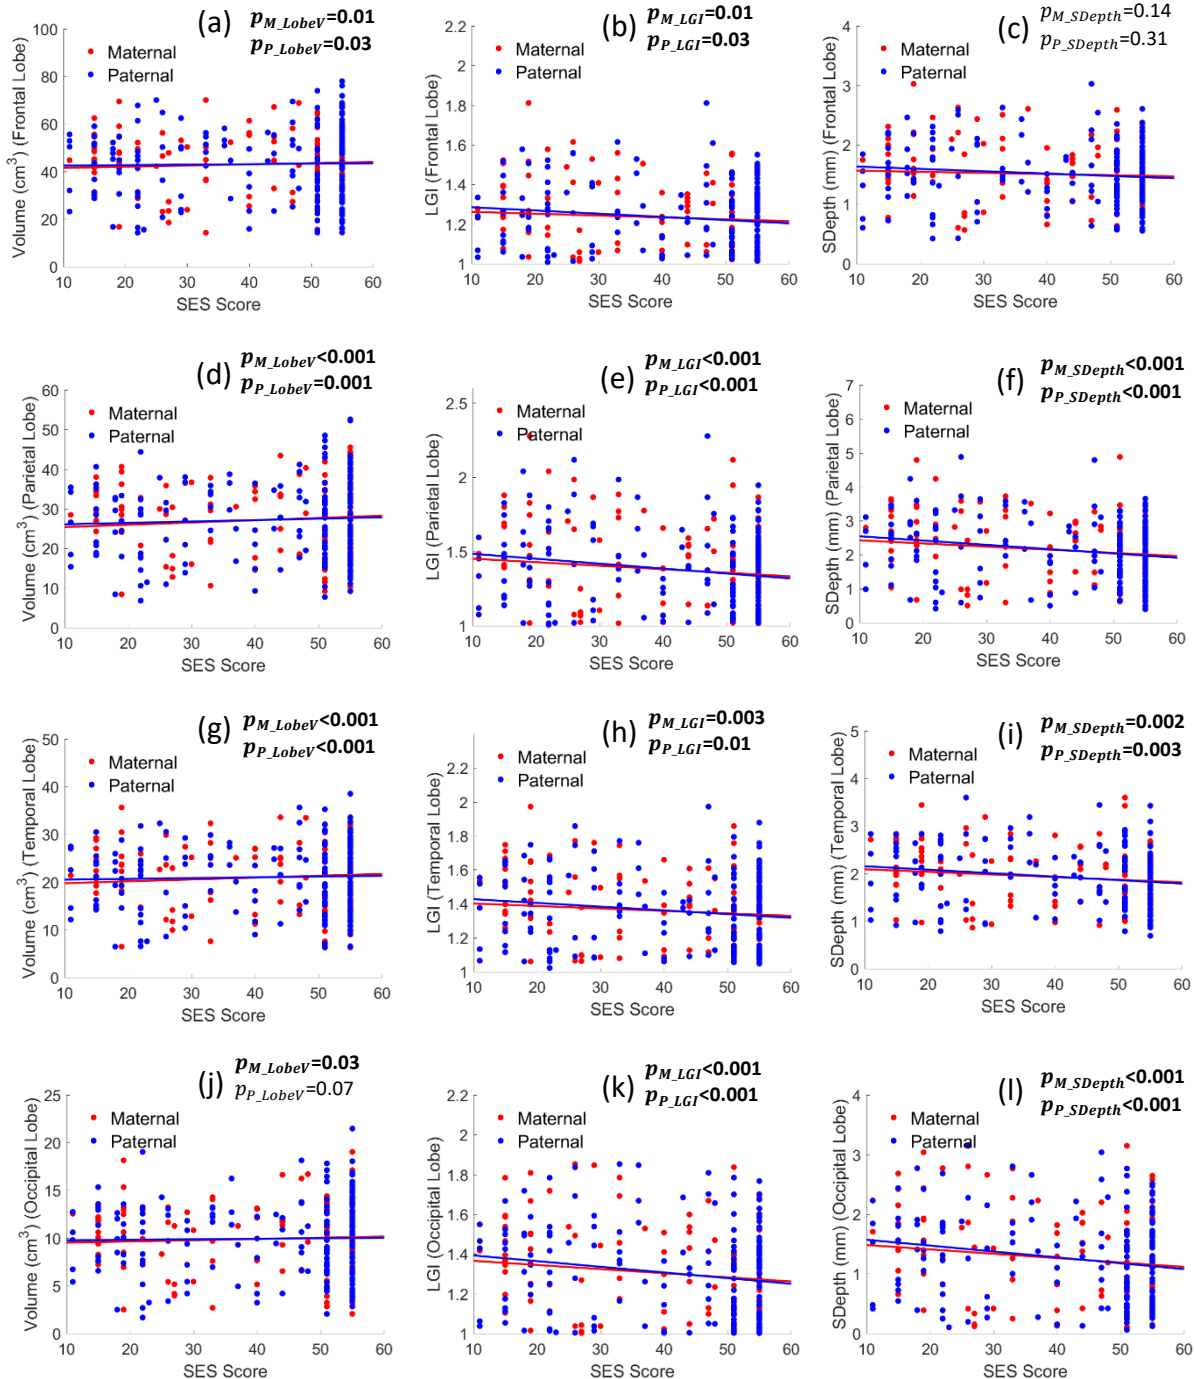

**eFigure 9.** Cerebral Cortical Features vs Gestational Age

Scatter plots of brain lobe volume/LGI/SDepth vs. gestational age. (a)-(c): Frontal lobe; (d)-(f) Parietal lobe; (g)-(i): Temporal lobe; (j)-(l): Occipital lobe. The straight lines are the linear fit of the data by parental SES. The  $p$ -values are corresponding to  $p_{SES}$  shown in eTable 6. LGI: Local gyrification index. SDepth: Sulcal depth. Bold  $p$ :  $p < 0.05$ .

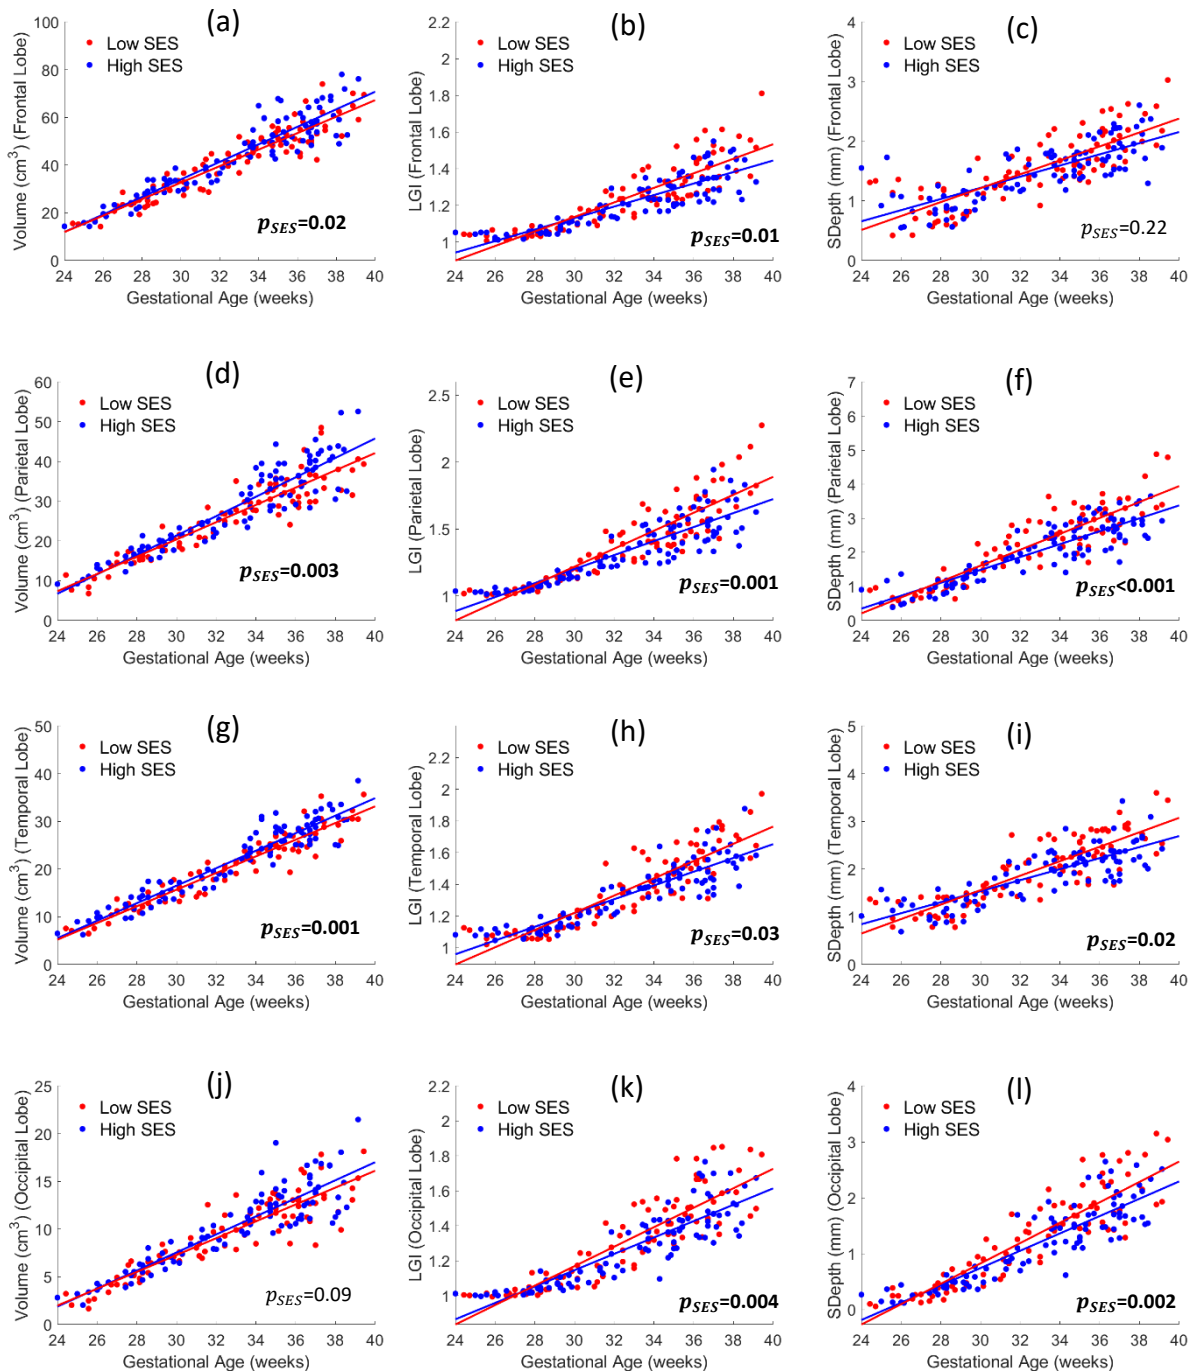

Supplement: jamanetwopen-e213526-s001.pdf [file jamanetwopen-e213526-s001.pdf]
